# Supplementary material for: A Novel ‘Candidatus Liberibacter asiaticus’-Encoded Sec-Dependent Secretory Protein Suppresses Programmed Cell Death in Nicotiana benthamiana
Source: PubMed Central journal article supplement (PMC6888338; doi:10.3390/ijms20225802), 2019-11-18
Supplement: ijms-20-05802-s001.pdf [file ijms-20-05802-s001.pdf]

```

1
psy62 TTGGGGTTTCGTTTTGGGTATCACGTATACAAATTTTTTATCGCTTGTGATTGATTTCTCTCTTGGTTTGTCTTTACTTT
lshi-1 TTGGGGTTTCGTTTTGGGTATCACGTATACAAATTTTTTATCGCTTGTGATTGATTTCTCTCTTGGTTTGTCTTTACTTT
AHCA1 TTGGGGTTTCGTTTTGGGTATCACGTATACAAATTTTTTATCGCTTGTGATTGATTTCTCTCTTGGTTTGTCTTTACTTT
JXGC TTGGGGTTTCGTTTTGGGTATCACGTATACAAATTTTTTATCGCTTGTGATTGATTTCTCTCTTGGTTTGTCTTTACTTT
A4 TTGGGGTTTCGTTTTGGGTATCACGTATACAAATTTTTTATCGCTTGTGATTGATTTCTCTCTTGGTTTGTCTTTACTTT
gxpsy TTGGGGTTTCGTTTTGGGTATCACGTATACAAATTTTTTATCGCTTGTGATTGATTTCTCTCTTGGTTTGTCTTTACTTT
                the encoding sequence of the putative signal peptide
91
psy62 CTTTATTGATTGGTGATGTTTCGCTTAAGGACATGTGATTTCAAATGACCTTTTTTTGTAAGTAA
lshi-1 CTTTATTGATTGGTGATGTTTCGCTTAAGGACATGTGATTTCAAATGACCTTTTTTTGTAAGTAA
AHCA1 CTTTATTGATTGGTGATGTTTCGCTTAAGGACATGTGATTTCAAATGACCTTTTTTTGTAAGTAA
JXGC CTTTATTGATTGGTGATGTTTCGCTTAAGGACATGTGATTTCAAATGACCTTTTTTTGTAAGTAA
A4 CTTTATTGATTGGTGATGTTTCGCTTAAGGACATGTGATTTCAAATGACCTTTTTTTGTAAGTAA
gxpsy CTTTATTGATTGGTGATGTTTCGCTTAAGGACATGTGATTTCAAATGACCTTTTTTTGTAAGTAA
156

```

**FIGURE S1.** ClustalW alignment of the nucleotide sequences of CLIBASIA\_03875 from six CLas strains for which the complete genome or chromosome was available, including psy62 (NC\_012985.3), lshi-1 (NZ\_AP014595.1), AHCA1 (NZ\_CP029348.1), JXGC (NZ\_CP019958.1), A4 (NZ\_CP010804.1) and gxpsy (NC\_020549.1). The coding sequence of the putative signal peptide is underlined.

Table S1. The primers used in this study<sup>1</sup>

| Construct/Gene Name | Primer Name | Primer Sequence (5' -3' )                      |
|---------------------|-------------|------------------------------------------------|
| pMD3875             | 3875F       | TTGGGGTTTCGTTTTTGGGTA                          |
|                     | 3875R       | TTACTTACAAAAAAGGTCATTG                         |
| pET-3875SP-mphoA    | 3875SP-F    | AAGGAGATATACATATGTTGGGGTTTCGTTTTTGGGTA         |
|                     | 3875SP-R    | AGGCATTCTGGAGCTTATAAAGCAAAGTAAAAACAAACCA       |
| pm3875-GFP          | m3875gfp-F  | GACGAGCTCGGGTACCATGTTGCTTTATTGATTGGTGA         |
|                     | m3875gfp-R  | TGGTGTGACTCTAGACTTACAAAAAAGGTCATTGA            |
| pPVX-m3875          | m3875-F     | GAGCACCAGCTAGCATCGATATGTTGCTTTATTGATTGG        |
|                     | m3875-R     | CAAGCTTATCGGCGTTCGACTTACTTACAAAAAAGGTCATT      |
| pPVX-eGFP           | eGFP-F      | GAGCACCAGCTAGCATCGATATGTTGAGCAAGGGCGAGGA       |
|                     | eGFP-R      | CAAGCTTATCGGCGTTCGACTCAAAGATCTACCATGTACA       |
| pPVX-A7             | ES34m1-F    | GAGCACCAGCTAGCATCGATATGTTGCTTTATTGATTGGTGTCTGT |
|                     | m3875-R     | --                                             |
| pPVX-A9             | ES34m2-F    | GAGCACCAGCTAGCATCGATATGTTGCTTTATTGATTGGTGATGTT |
|                     |             | GCCTTAAG                                       |
| pPVX-A11            | m3875-R     | --                                             |
|                     | ES34m3-F    | GAGCACCAGCTAGCATCGATATGTTGCTTTATTGATTGGTGATGTT |
|                     |             | CGCTTAGCG                                      |
| pPVX-A7-11          | m3875-R     | --                                             |
|                     | ES34m4-F    | GAGCACCAGCTAGCATCGATATGTTGCTTTATTGATTGGTGCTGTT |
|                     |             | GCCTTAGC                                       |
| pPVX-A22            | m3875-F     | --                                             |
|                     | ES34m5-R    | CAAGCTTATCGGCGTTCGACTTACGCACAAAAAAGGTCATT      |
| <b>qPCR assay</b>   |             |                                                |
| <i>Nbactin</i>      | NbActin-F   | GCAGGAATCCACGAGACTACA                          |
|                     | NbActin-R   | AACCTCCAATCCAGACACTGT                          |
| <i>NbCNGC23</i>     | NbCNGC23-F  | CAGTTATCGTCACGGTGATAC                          |
|                     | NbCNGC23-R  | CCTGAGGGACAGGTAGGACGAC                         |

|                 |            |                          |
|-----------------|------------|--------------------------|
| <i>NbCNGC24</i> | NbCNGC24-F | AATCATCGTTCTTACTAGTGGGCT |
|                 | NbCNGC24-R | CATCCTCTGCTTGTAATCCTGTGG |
| <i>NbCNGC25</i> | NbCNGC25-F | CGTTCTTACCTCTGGGTAAAT    |
|                 | NbCNGC25-R | GTTCTCTGCTTTAATTCTCGAGG  |
| <i>NbCNGC26</i> | NbCNGC26-F | GAGAGGCTTAAGCGAACAGCA    |
|                 | NbCNGC26-R | CCCATTCTCCATTACCTGATTCAC |
| <i>NbBI-1</i>   | NbBI1-F    | CTTTTCTGGTTGCACTTTGCG    |
|                 | NbBI1-R    | AAAGAGGGTCAGAGCATGCTTC   |
| <i>NbBI-2</i>   | NbBI2-F    | GCACTCTTTGAAGGGGCTTCTG   |
|                 | NbBI2-R    | CCCAAGGTACAAGTACTCTCTGC  |
| <i>NbWRKY9</i>  | NbWRKY9-F  | CATCCAAAGCCTCAGTCCAC     |
|                 | NbWRKY9-R  | CCTTCCATCTCTTCGCCTCA     |

1. The restriction recognition sequences of *Nde* I (CATATG), *Hind* III (AAGCTT), *Kpn* I (GGTACC), *Xba* I (TCTAGA), *Cla* I (ATCGAT) and *Sal* I (GTCGAC) within the primers are in bold and underlined. Genes included in qPCR assay are *Nbactin* (GenBank No. JQ256516.1), *NbBI-1* (GenBank No. JX481914.1), *NbWRKY9* (GenBank No. AB711130.1), as well as five additional ones *NbCNGC23* (Niben101Scf08863g01010.1), *NbCNGC24* (Niben101Scf08680g02015.1), *NbCNGC25* (Niben101Scf04528g09004.1), *NbCNGC26* (Niben101Scf08157g02012.1) and *NbBI-2* (Niben101Scf02705g01020.1) from *N. benthamiana* draft genome sequence V1.0.1 ([https://solgenomics.net/organism/Nicotiana\\_benthamiana/genome](https://solgenomics.net/organism/Nicotiana_benthamiana/genome)).
